# Supplementary material
Source: MDPI journal article supplement (https://www.mdpi.com/2673-9917/2/2/27)
Supplement: s1 [file s1]

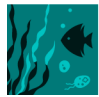

# Supplemental Material for Recurrently Hypoxic: Bottom Water Oxygen Depletion Is Linked to Temperature and Precipitation in a Great Lakes Estuary

**Table S1.** Table of Muskegon River discharge and temperature values averaged from January–July 2011–2021, timetable prior to the onset of hypoxic. In 2020 data acquisition was incomplete due to Covid-related issues and was not included in the estimation of the hypoxia severity index. Thus, data for 2020 is not shown.

| Date | Discharge (m <sup>3</sup> /s) | River Temperature (°C) |
|------|-------------------------------|------------------------|
| 2011 | 76.5                          | 6.9                    |
| 2012 | 71.3                          | 8.7                    |
| 2013 | 93                            | 6.6                    |
| 2014 | 84.6                          | 6.5                    |
| 2015 | 67                            | 6.9                    |
| 2016 | 85.1                          | 7.5                    |
| 2017 | 89.8                          | 7.8                    |
| 2018 | 82.3                          | 7.3                    |
| 2019 | 93.6                          | 6.5                    |
| 2021 | 50                            | 7.9                    |

**Table S2.** The onset and disruption of stratification. 2020 was removed due to the lack of data during the Covid-year.

| Year | Onset of Stratification | Breakdown of Stratification |
|------|-------------------------|-----------------------------|
| 2011 | June 9th                | September 17th              |
| 2012 | May 21st                | September 13th              |
| 2013 | June 24th               | September 17th              |
| 2014 | May 30th                | September 10th              |
| 2015 | July 4th                | September 9th               |
| 2016 | May 25th                | September 24th              |
| 2017 | June 13th               | October 5th                 |
| 2018 | May 26th                | September 27th              |
| 2019 | June 28th               | September 4th               |
| 2021 | May 20th                | September 7th               |

**Table S3.** Chronologically ordered table illustrating the number of days where hypoxia was detected at a mild or severe level of hypoxia or near anoxia. 2018 was missing a large portion of data and showed signs of severe hypoxia including high strength of stratification values.

| Year | Mild Hypoxia 8m | Severe Hypoxia 8m | Near Anoxia 8m | Mild Hypoxia 11m | Severe Hypoxia 11m | Near Anoxia 11m | Hypoxic Severity Index |
|------|-----------------|-------------------|----------------|------------------|--------------------|-----------------|------------------------|
| 2011 | 17              | 40                | 8              | 35               | 34                 | 16              | 63.38                  |
| 2012 | 31              | 7                 | 0              | 6                | 39                 | 19              | 91.27                  |
| 2013 | 33              | 21                | 0              | 52               | 40                 | 0               | 42.32                  |
| 2014 | 18              | 0                 | 0              | 41               | 13                 | 0               | 26.13                  |
| 2015 | 12              | 0                 | 0              | 23               | 15                 | 2               | 20.95                  |
| 2016 | 22              | 14                | 2              | 27               | 42                 | 6               | 56.96                  |
| 2017 | 8               | 7                 | 0              | 36               | 36                 | 1               | 44.96                  |
| 2018 | 16              | 22                | 0              | 8                | 26                 | 9               | 51.52                  |
| 2019 | 25              | 1                 | 0              | 45               | 16                 | 2               | 25.86                  |
| 2021 | 24              | 14                | 0              | 13               | 32                 | 28              | 97.06                  |

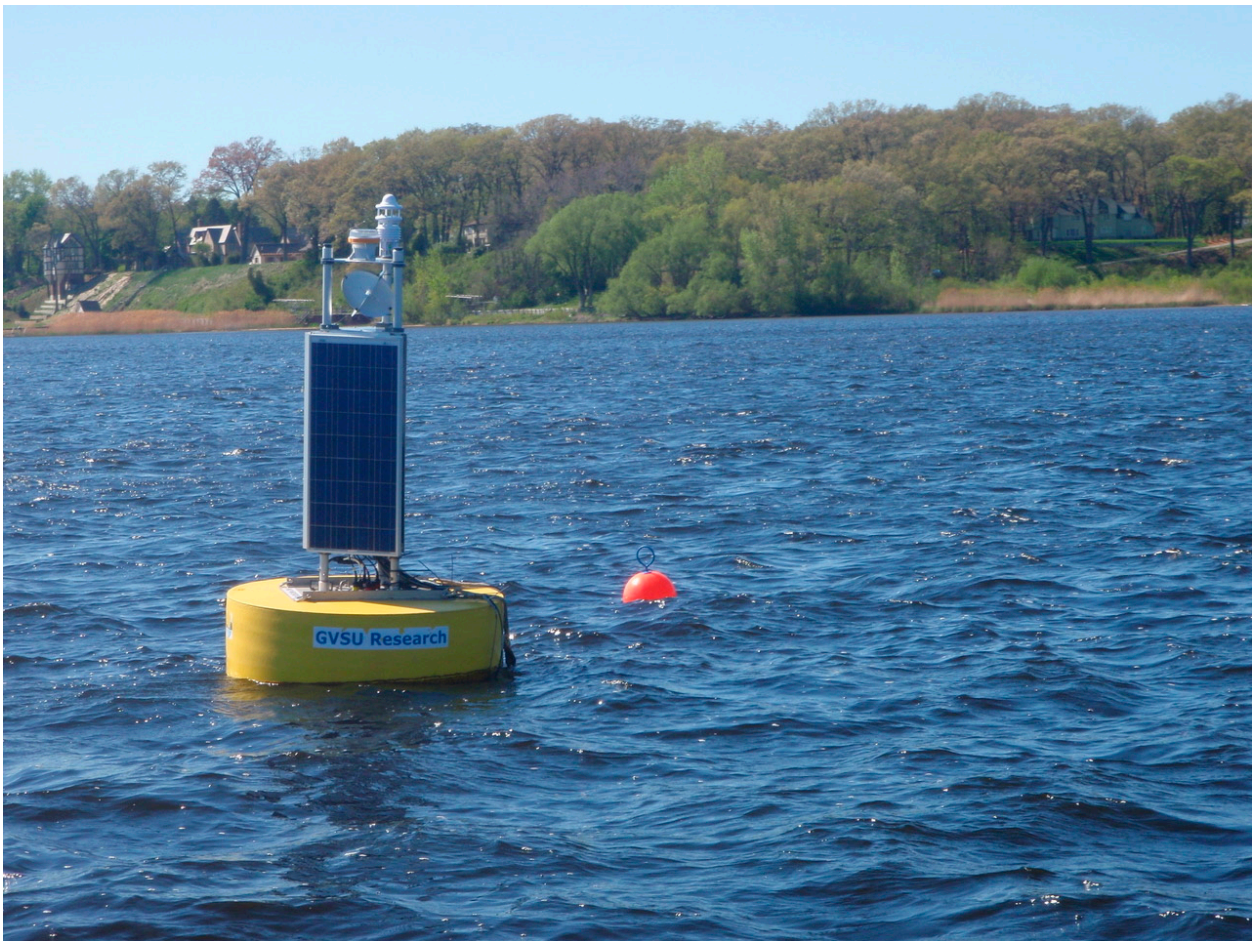

**Figure S1.** Muskegon Lake Observatory gathering time-series meteorological and water quality data in Muskegon Lake, MI.

(A)

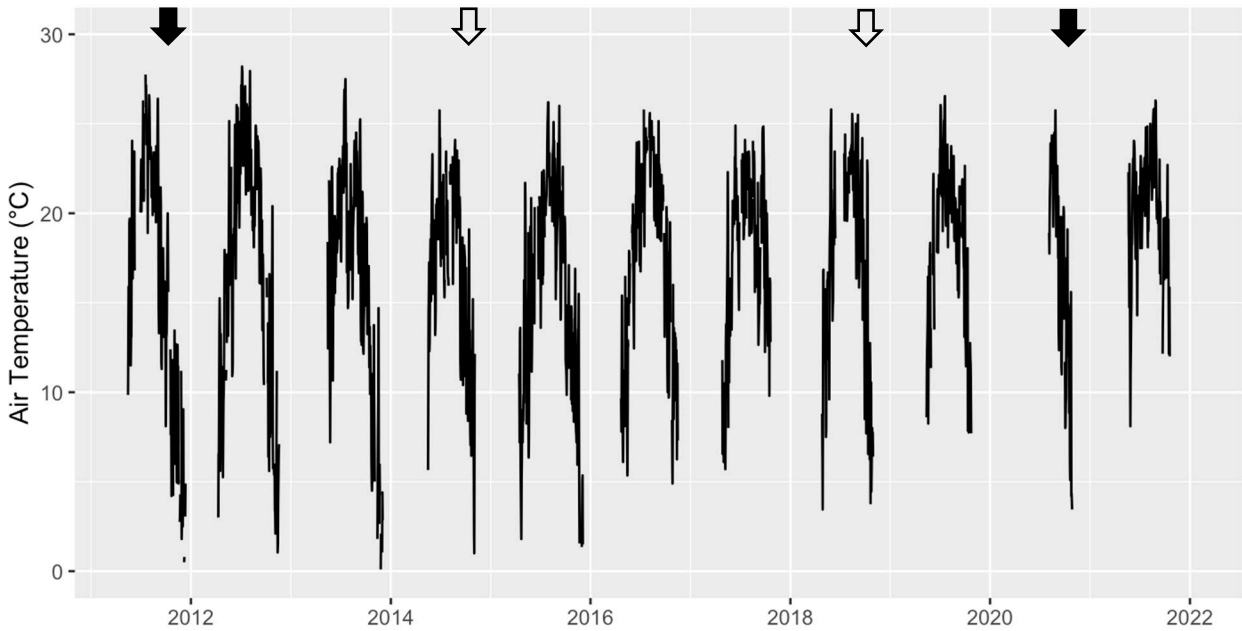

(B)

20

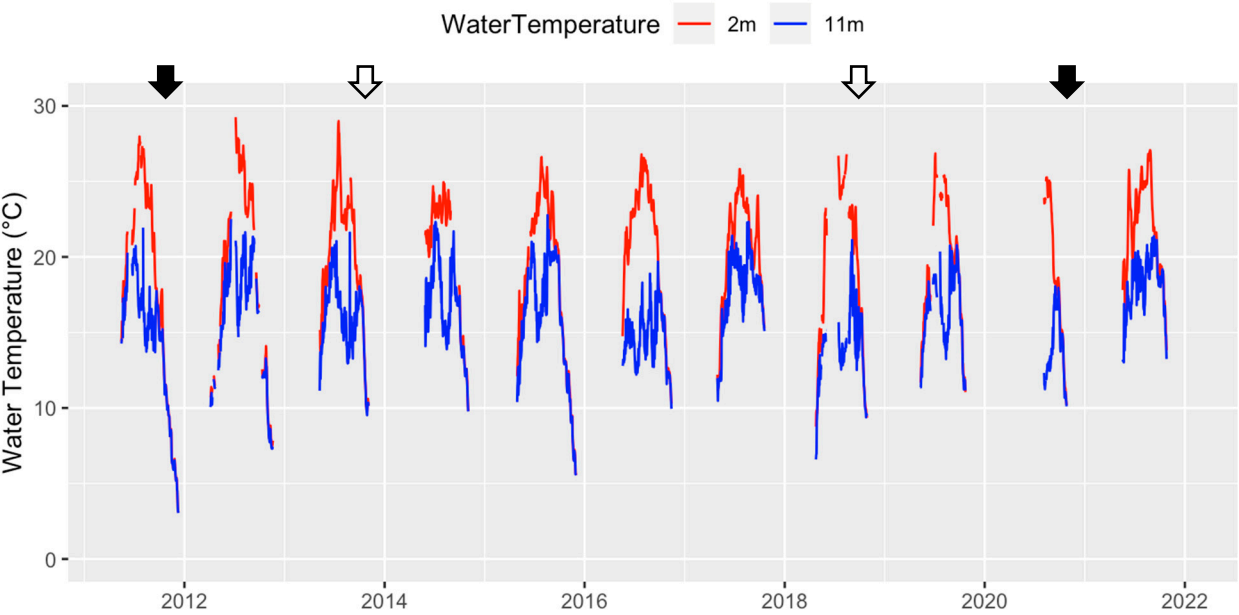

21

(C)

22

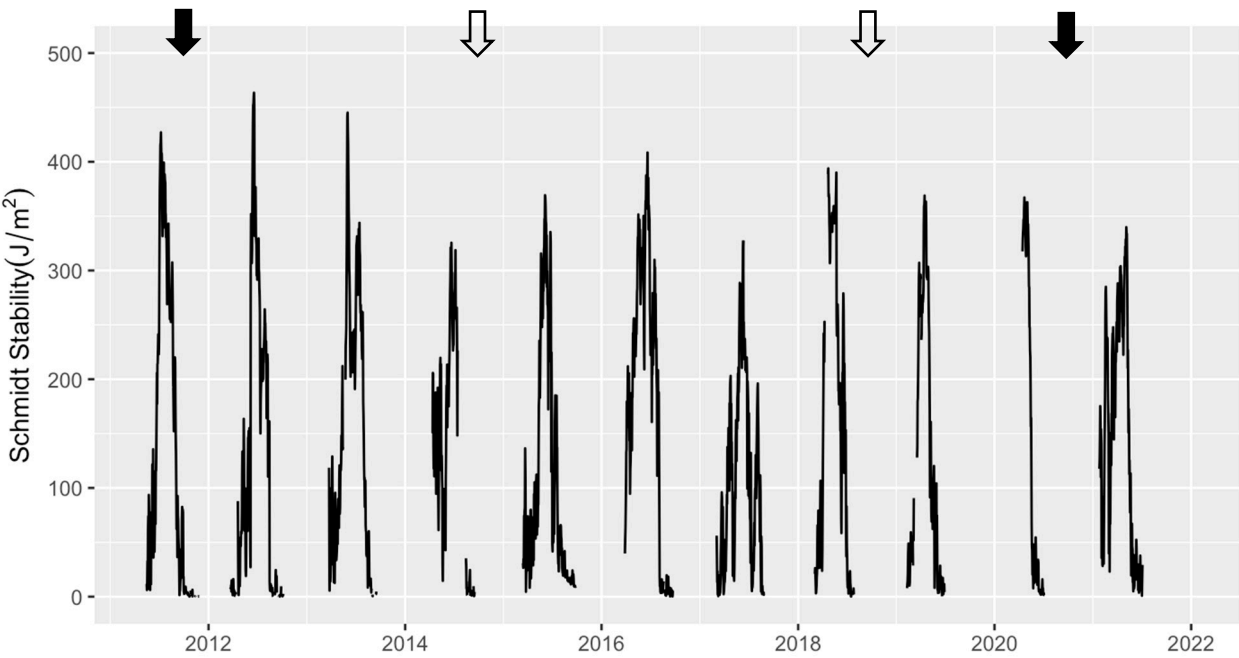

23

24

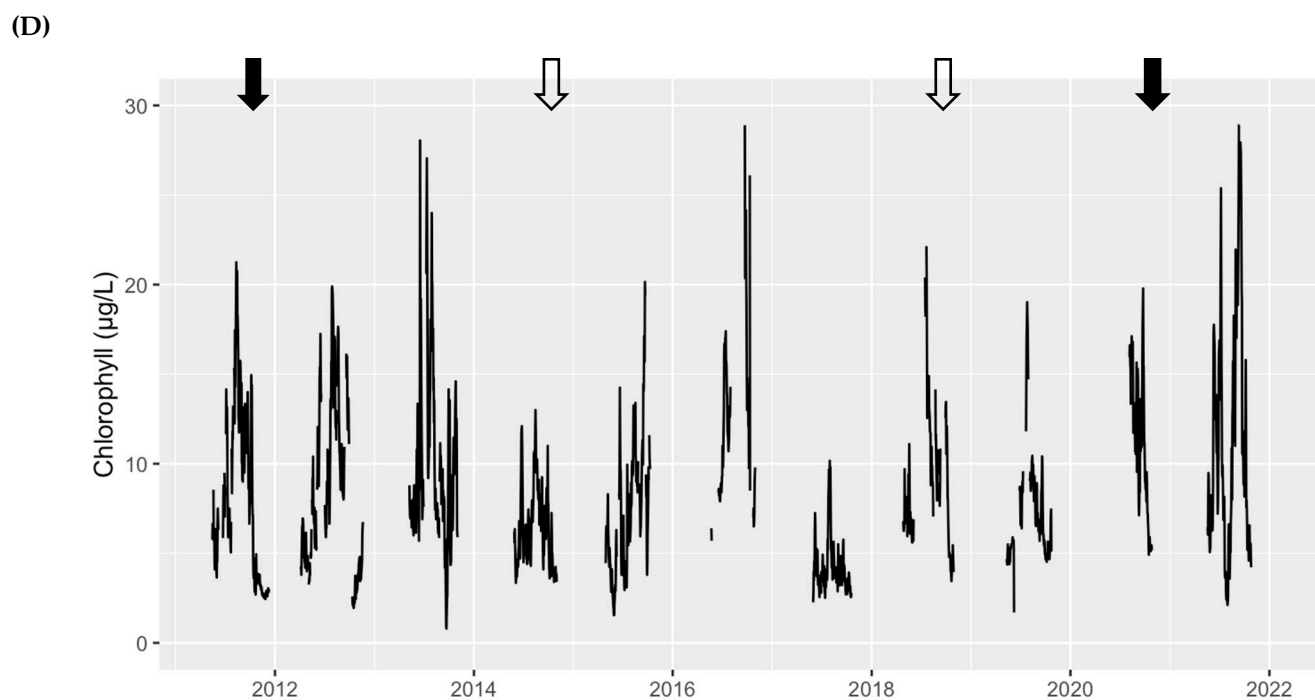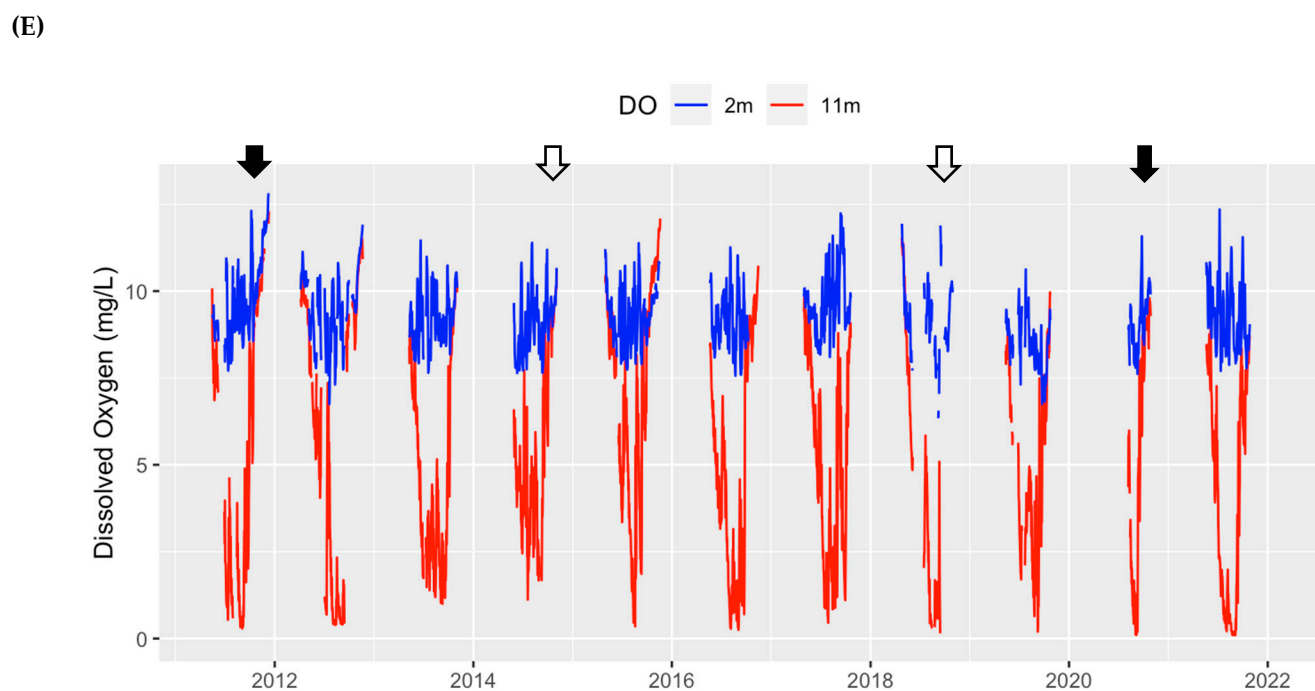

**Figure S2.** Time-series graphs of (A) air temperature, (B) surface water temperature, (C) Schmidt Stability, (D) surface chlorophyll-a at 2 m, and (E) DO at 2 m and 11 m from 2011–2021. Filled arrows represent the two most severely hypoxic years while empty arrows represent the two least severely hypoxic years.



34

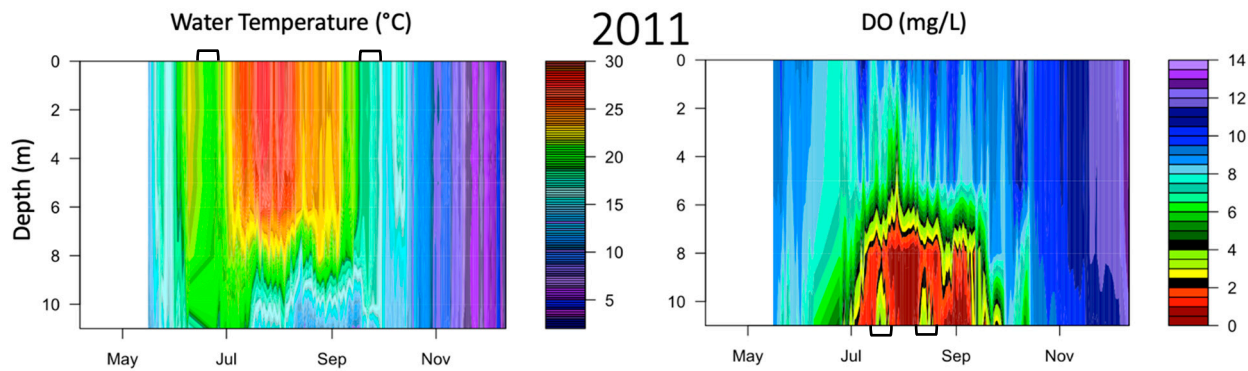

35

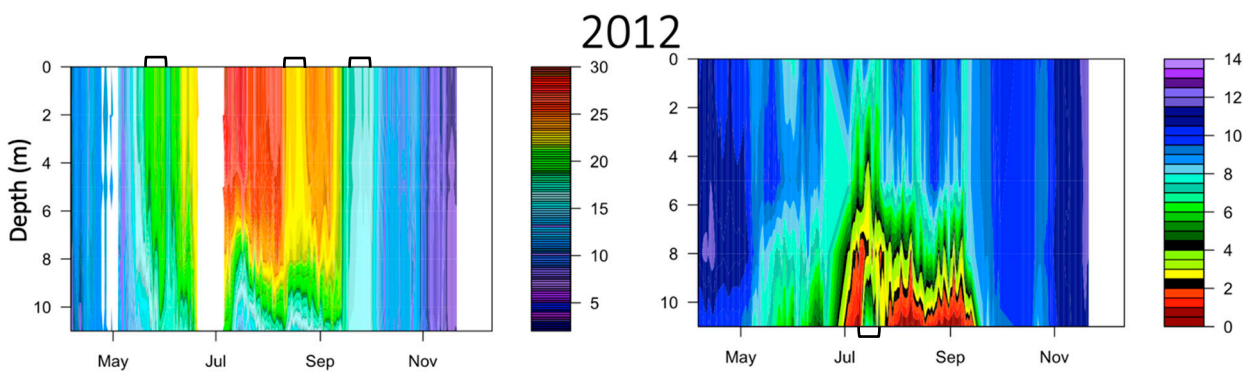

36

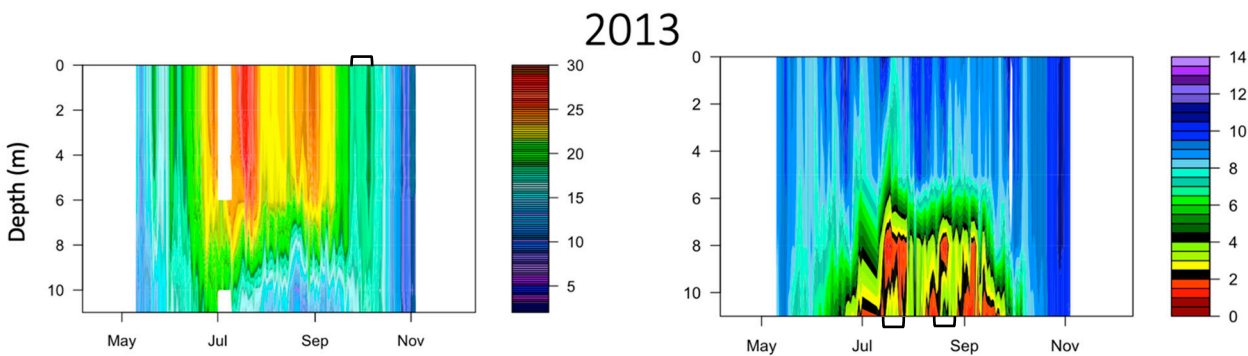

37

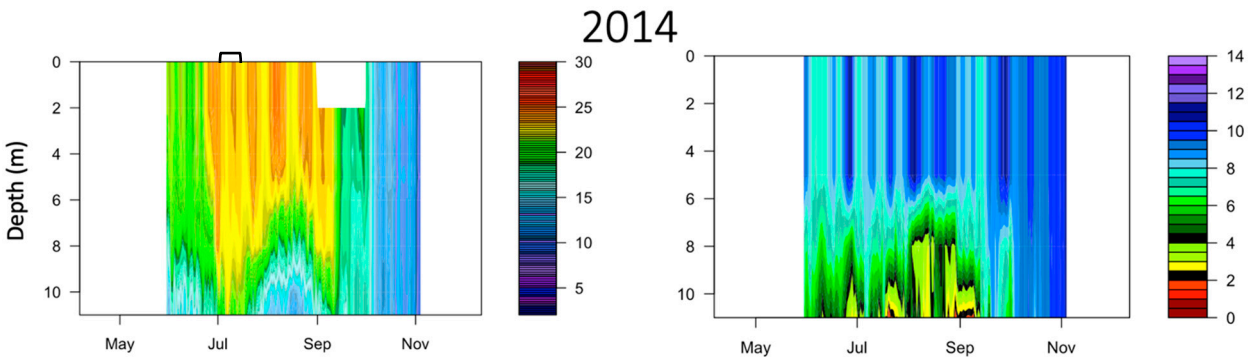

38

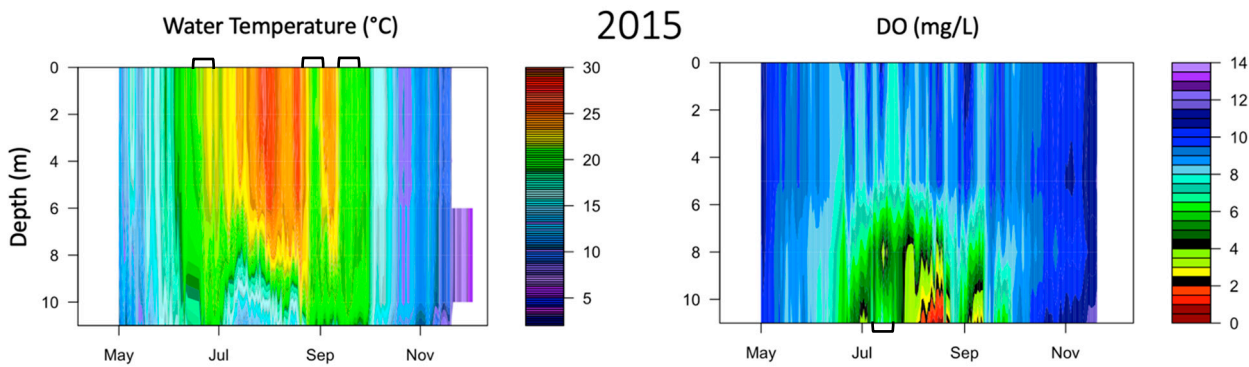

39

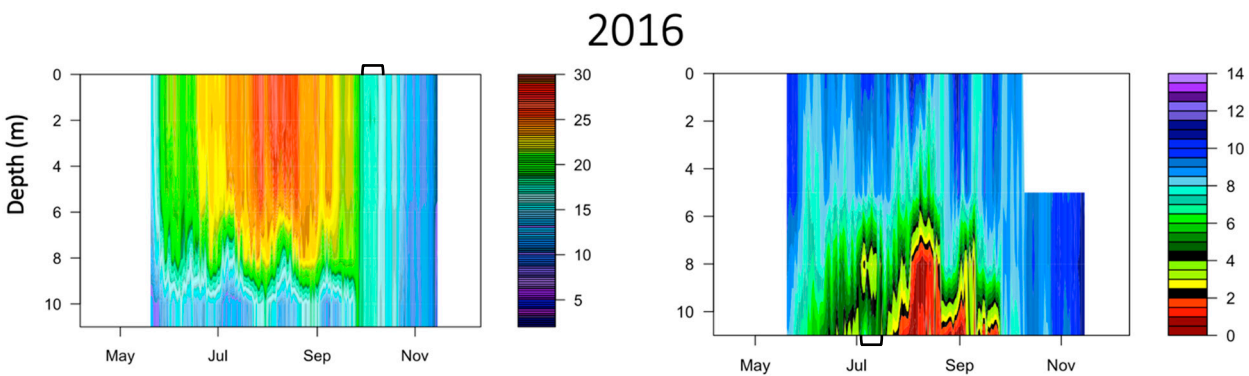

40

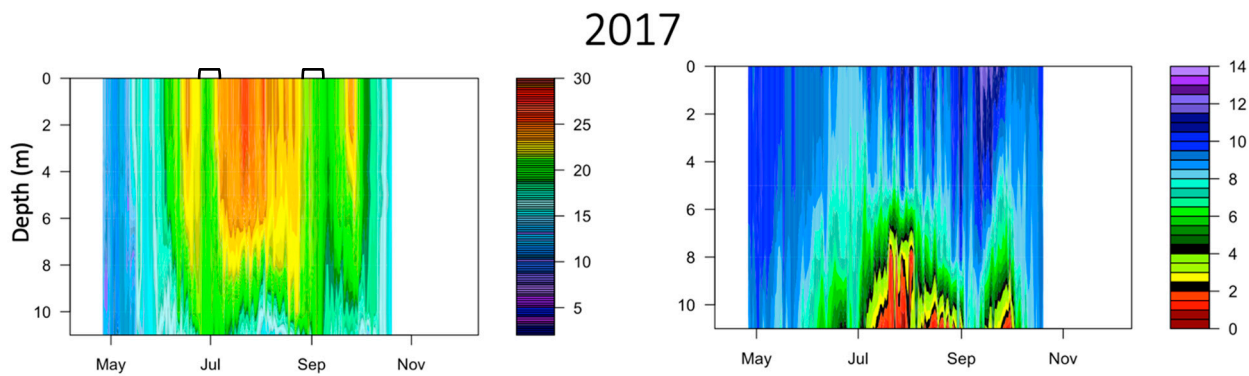

41

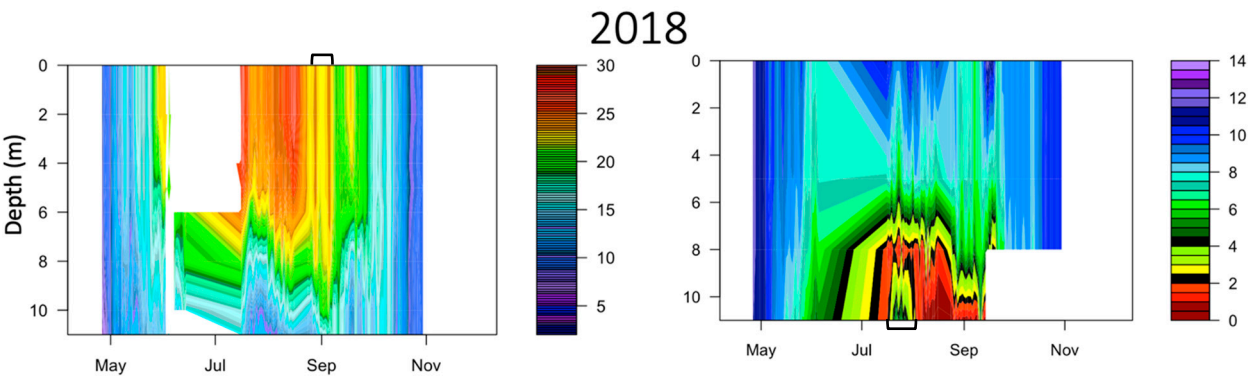

42

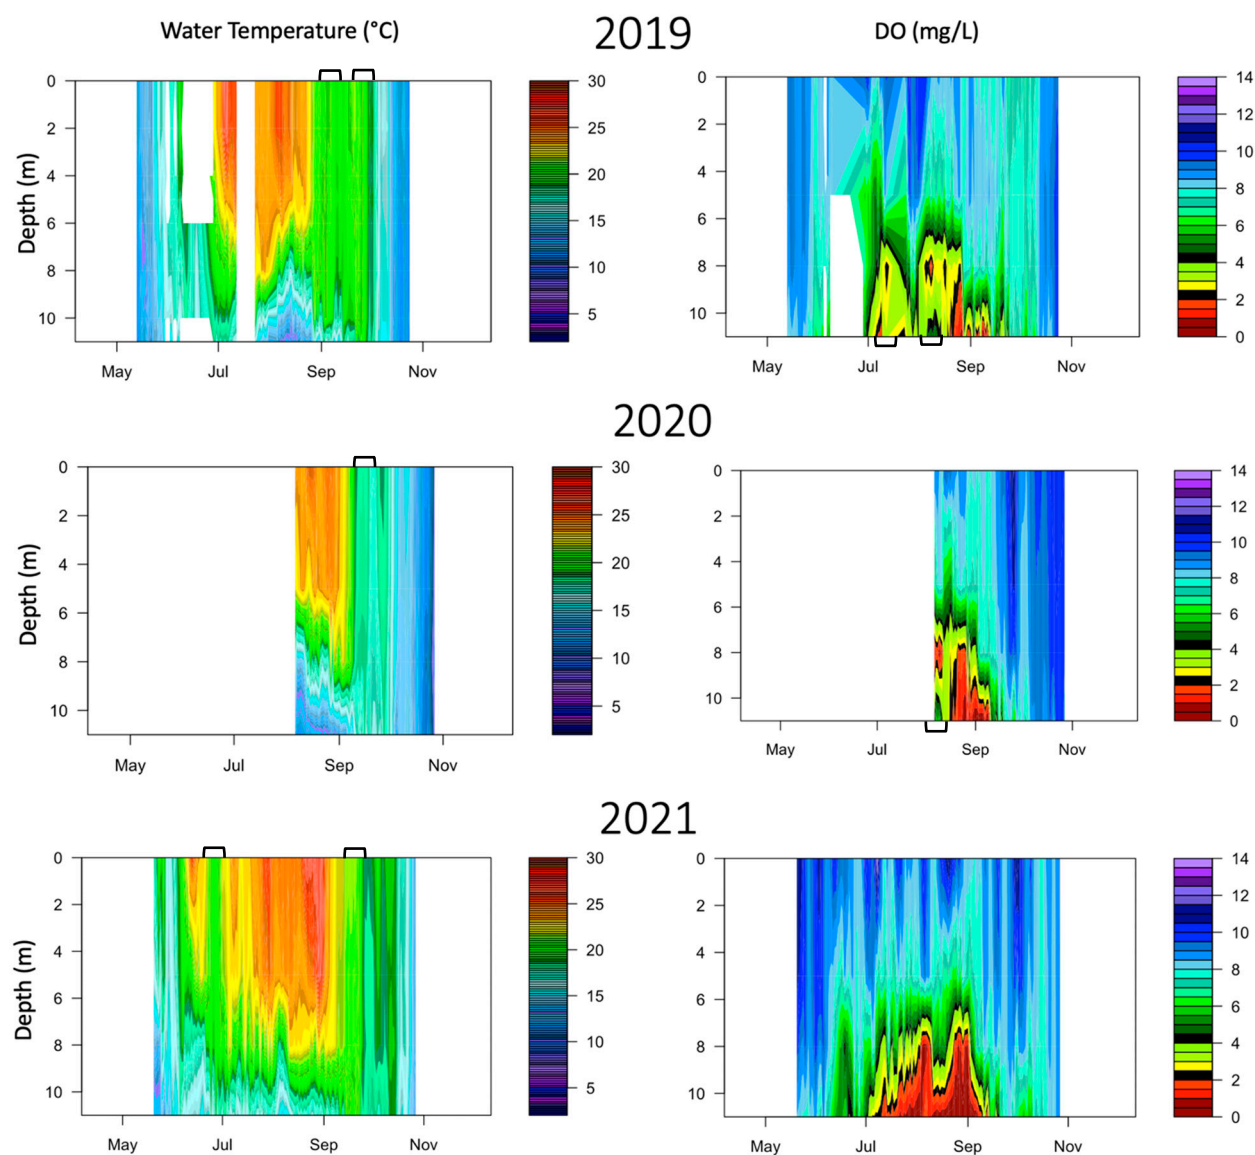

**Figure S3.** Time-series heat maps of 2011-2021 thermal stratification and dissolved oxygen from the Muskegon Lake Observatory (MLO) buoy. Each graph is scaled to the earliest deployment and the latest retrieval of the MLO leading to the lack of data when the buoy was not yet deployed in other years. Black lines were drawn at DO concentrations of 4 mg/L to signify mild hypoxia and 2 mg/L to signify severe hypoxia. Black brackets were drawn to highlight wind mixing events and cold, oxygenated upwelled water intrusions, respectively. Missing data throughout the heat maps are attributed to malfunctioning sensors and extreme biofouling.

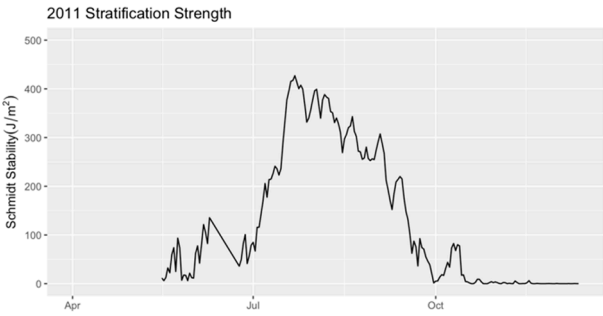

53

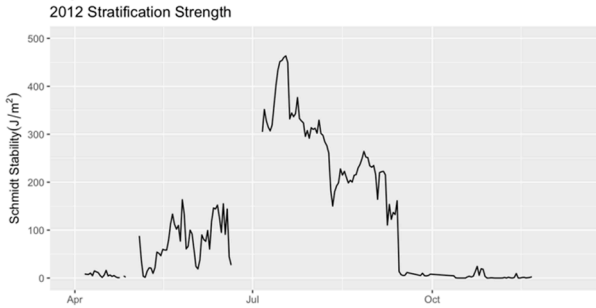

54

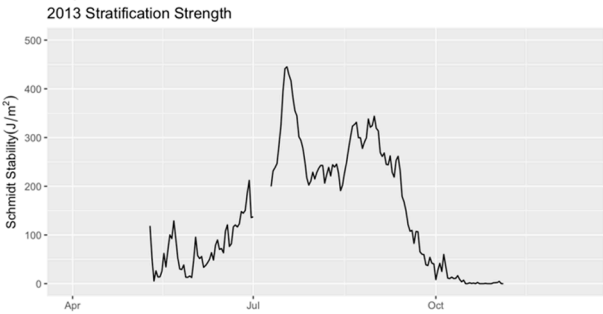

55

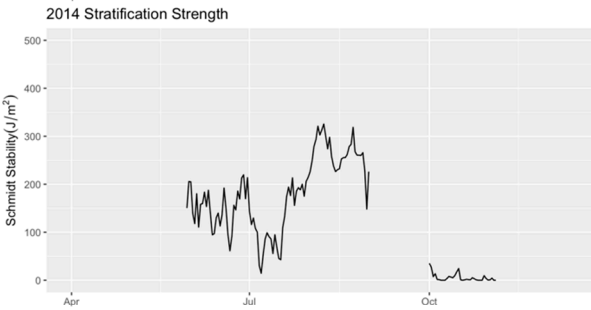

56

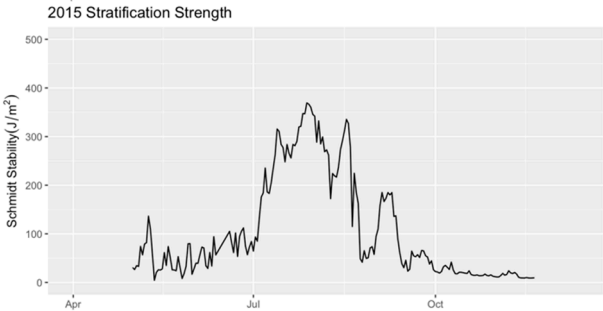

57

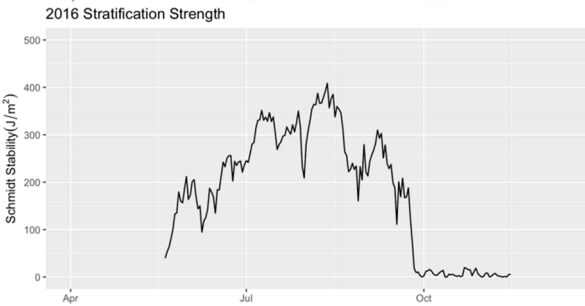

58



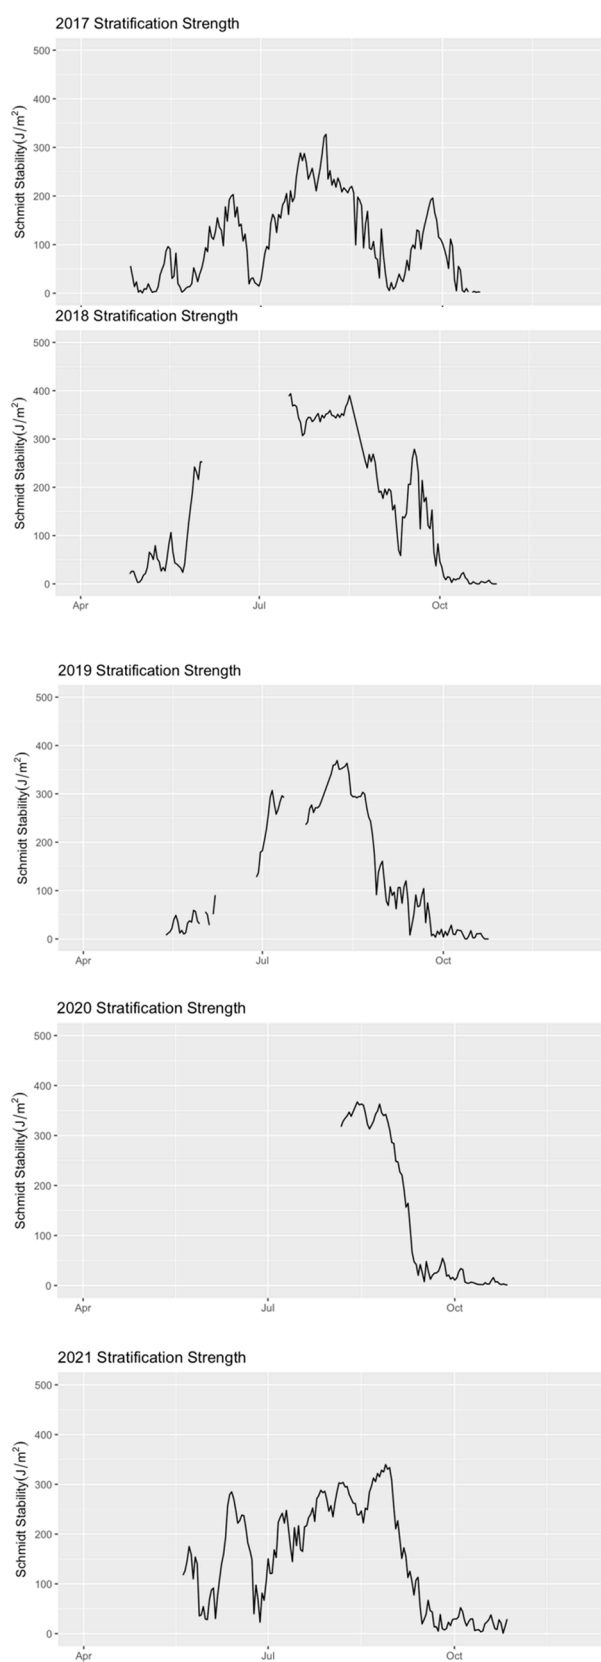

**Figure S4.** Schmidt stability time-series graphs from 2011-2021. Higher values correspond with stronger stratification while values at 0 signify a mixed estuary. The lack of data for 2020 was due to the late deployment of the Muskegon Lake Observatory buoy in light of Covid-19.

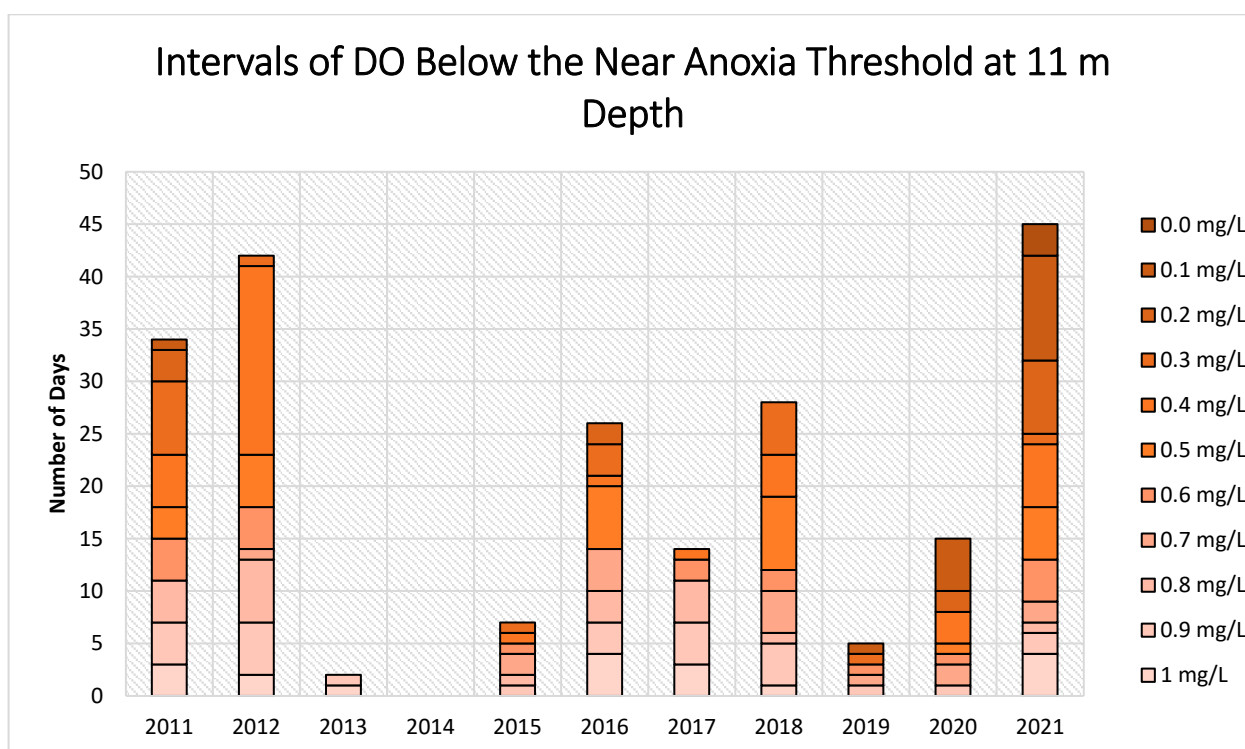

**Figure S5.** Histogram of DO intervals below the near anoxia threshold of 1 mg/L from 2011-2021. Each interval is on a scale of 0.1 mg/L. The histogram determines the number of days that daily averaged DO concentrations reached that interval at 11m depth.
