# Supplementary material
Source: MDPI journal article supplement (https://www.mdpi.com/2673-9917/2/2/27)
Supplement: s1 [file s1]

Archive with 1 entries (1 files):
- hydrobiology-2341665-supplementary.pdf
